# Supplementary material
Source: PubMed Central journal article supplement (PMC2649386)
Supplement: pp.108.128314_1.pdf [file pp.108.128314_1.pdf]

## SUPPLEMENTAL DATA

*Table S1*

*Primers used in this study*

| Primer         | Sequence                             | Description |
|----------------|--------------------------------------|-------------|
| UpAtAHT1       | GGATCCGTCCAAGCGTTAGCT                | Expression  |
| LowAtAHT1      | CCCGGGTTCACCTGAATCTTCAAC             | Expression  |
| UpAtAHT2a      | GGATCCGTCAAGGTAGATGAAAAT             | Expression  |
| LowAtAHT2a     | CCCGGGACTTGATGCAGCTGG                | Expression  |
| UpAtAHT4a      | GGATCCTCATCAGCTATCACAGC              | Expression  |
| LowAtAHT4a     | CCCGGGTCTCCCTGCGGAG                  | Expression  |
| UpAtTrx-f1     | GGATCCAGCTTAGAAACCGTTAATGTCA         | Expression  |
| LowAtTrx-f1    | GTCGACTCCGGAAGCAGCAGACCTCG           | Expression  |
| UpAtPrxA       | AAAGGATCCAAAGCCCAGGCCGATGATC         | Expression  |
| LowAtPrxA      | AAAAAGCTTCTAAATAGCTGAGAAGTACTCT      | Expression  |
| UpAtMDH        | ATGGATCCTCCGTTTCTCAAATAGCCAAG        | Expression  |
| LowAtMDH       | AAAAAGCTTTCAAACCTCCCAGGAAGCA         | Expression  |
| UpAtAHT1-RT    | GCCAAACATGATTGACATTACCTCA            | sqRT-PCR    |
| LowAtAHT1-RT   | CTCAGTTTCTGGAACCTGGCAAGAGAGCAT       | sqRT-PCR    |
| UpAtAHT2a-RT   | CTCTTGCTAAGTTTCAGAAGATAAAAAGATGCAAT  | sqRT-PCR    |
| LowAtAHT2a-RT  | AACTTGATGCAGCTGGTTTGGCTAA            | sqRT-PCR    |
| UpAtAHT2b-RT   | TTCTCTTGCTAAGGTAAAGAAGGCTATTTTCGGTTT | sqRT-PCR    |
| LowAtAHT2b-RT  | TTGATAGATCCTATCGAAAAAGAACAACG        | sqRT-PCR    |
| UpAtAHT4a-RT   | AAGTGGTGGGAGAAAGGTCTGAAAG            | sqRT-PCR    |
| LowAtAHT4a-RT  | CTGAATTTCTTGATCGTGGCATTGGTACAG       | sqRT-PCR    |
| UpAtTrx-f1-RT  | GACGACGAAGATTGGTTTCTGTTCT            | sqRT-PCR    |
| LowAtTrx-f1-RT | CTCTTTTGCCAATGGCCGGTTATCTGGATT       | sqRT-PCR    |
